# Supplementary material for: αI-spectrin represents evolutionary optimization of spectrin for red blood cell deformability
Source: PubMed Central journal article supplement — Biophys J. 2021 Aug 2;120(17):3588–99. doi: 10.1016/j.bpj.2021.07.027 (PMC8456306; doi:10.1016/j.bpj.2021.07.027), 2021-08-02
Supplement: mmc1.pdf [file mmc1.pdf]

**Biophysical Journal, Volume 120**

**Supplemental information**

**$\alpha$ -spectrin represents evolutionary optimization of spectrin for red  
blood cell deformability**

**John Hale, Xiuli An, Xinhua Guo, Erjing Gao, Julien Papoin, Lionel Blanc, Christopher D. Hillyer, Walter Gratzer, Anthony Baines, and Narla Mohandas**

Supplementary Information for

## $\alpha$ I-spectrin represents evolutionary optimization of spectrin for red blood cell deformability.

### **Authors**

John Hale<sup>1\*</sup>, Xiuli An<sup>2</sup>, Xinhua Guo<sup>2</sup>, Erjing Gao<sup>1</sup>, Julien Papoin<sup>3</sup>, Lionel Blanc<sup>3,4</sup>, Christopher D. Hillyer<sup>1</sup>, Walter Gratzer<sup>5</sup>, Anthony Baines<sup>6</sup> and Narla Mohandas<sup>1</sup>

### **Affiliations**

1 The Red Cell Physiology Laboratory, The New York Blood Center, New York, New York 10021

2 Membrane Biology Laboratory, The New York Blood Center, New York, New York 10021

3 Nelkin Laboratory of Pediatric Oncology and Laboratory of Developmental Erythropoiesis, The Feinstein Institutes for Medical Research, Manhasset, NY 11030

4 Department of Molecular Medicine and Pediatrics, Zucker School of Medicine at Hofstra/Northwell, Hempstead, NY 11549

5 Randall Division of Cell and Molecular Biophysics, King's College London, New Hunt's House, Guy's Campus, London SE1 1UL, UK

6 Department of Biosciences, University of Kent, Canterbury, Kent, CT2 7NJ, UK

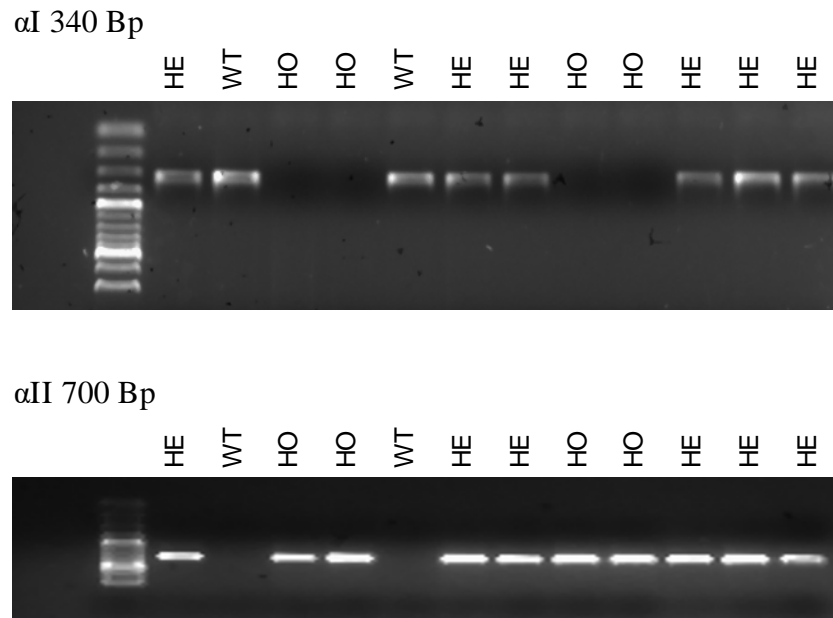

**Figure S1.** Genotyping by PCR of litter mates: (WT) wild-type mice, (HE) heterozygous and (HO) homozygous knock-in mice. 340-bp indicates presence of  $\alpha$ I-spectrin and 700-bp indicates presence  $\alpha$ II-spectrin.

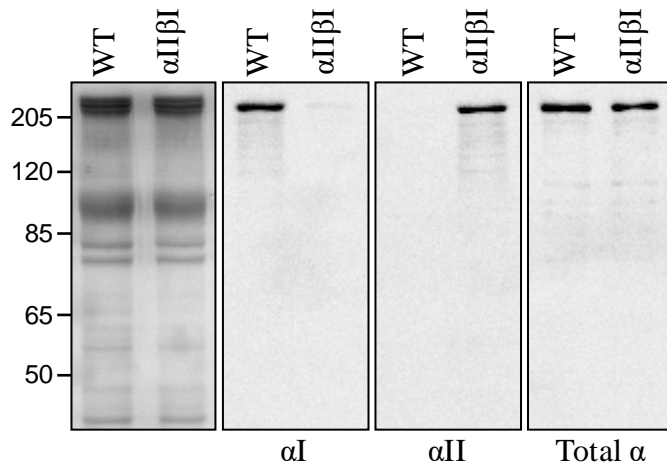

**Figure S2.** SDS gel electrophoresis and immunoblot analysis of WT and knock-in red cell membranes. Equal protein loadings of ghosts from either WT or  $\alpha II\beta I$  were separated by SDS gel electrophoresis and either stained with Coomassie brilliant blue (left panel) or transferred to PVDF and probed with antibodies specific for  $\alpha I$ ,  $\alpha II$  or total  $\alpha$ -spectrin as indicated. The positions of standard marker proteins (kDa) are indicated on the left edge.

|                                   | WT (n=9)             | $\alpha$ II $\beta$ I (n=7) |
|-----------------------------------|----------------------|-----------------------------|
| WBC (x10 <sup>3</sup> / $\mu$ l)  | 7.76 $\pm$ 1.57      | 7.07 $\pm$ 3.45             |
| RBC (x 10 <sup>6</sup> / $\mu$ l) | 9.93 $\pm$ 0.36      | 8.69 $\pm$ 0.21 ***         |
| HGB (g/dl)                        | 14.28 $\pm$ 0.49     | 12.9 $\pm$ 0.41 ***         |
| HCT (%)                           | 44.92 $\pm$ 1.81     | 40 $\pm$ 0.96 ***           |
| MCV (fl)                          | 45.32 $\pm$ 0.73     | 46 $\pm$ 0.43 *             |
| MCH (pg)                          | 14.38 $\pm$ 0.17     | 14.84 $\pm$ 0.16 ***        |
| MCHC (g/dl)                       | 31.77 $\pm$ 0.5      | 32.26 $\pm$ 0.5             |
| CHCM (g/dl)                       | 30.81 $\pm$ 0.32     | 31.27 $\pm$ 0.71            |
| CH (pg)                           | 13.93 $\pm$ 0.15     | 14.39 $\pm$ 0.23 **         |
| RDW (%)                           | 13.46 $\pm$ 0.99     | 13.03 $\pm$ 0.31            |
| HDW (%)                           | 1.81 $\pm$ 0.13      | 1.94 $\pm$ 0.05 *           |
| PLT (x 10 <sup>3</sup> / $\mu$ l) | 1217.56 $\pm$ 216.16 | 1233.57 $\pm$ 273.23        |
| MPV (fl)                          | 7.08 $\pm$ 0.73      | 7.03 $\pm$ 0.96             |
| Retic (%)                         | 3.17 $\pm$ 0.36      | 4.29 $\pm$ 0.58 **          |

**Table S1.** The hematological parameters of WT (n=9 mice) and  $\alpha$ II $\beta$ I (n=7 mice) red blood cell samples as measured by AVIDA 120. WBC indicates white blood cell count; RBC red blood cell count; HGB, hemoglobin; HCT, hematocrit; MCV, mean corpuscular volume; MCH, mean corpuscular hemoglobin; MCHC, mean corpuscular hemoglobin content; CHCM, corpuscular Hemoglobin concentration mean; CH, corpuscular hemoglobin content; RDW, red cell distribution width; HDW, hemoglobin distribution width; PLT, platelet count; MPV, mean platelet volume; Retic, reticulocyte count. Data is expressed as the mean  $\pm$  SD (standard deviation), P  $\leq$  0.05, \*\* P  $\leq$  0.01, \*\*\* P  $\leq$  0.001).

allbl-FIMD.avi

**Movie S1 (separate file).** Fluorescence imaged micro-deformation: Video of the captured image sequence of the micropipette aspirated  $\alpha$ II $\beta$ I RBC as the buffer is exchanged adjusting the RBC volume and thereby changing the aspiration tongue length.
